# Supplementary material
Source: publisher site journal article supplement (https://www.dovepress.com/article/505966)
Supplement: Supplementary file 1 [file get_supplementary_file.php]

**Supplementary material**

**Explainable Prediction of Long-Term Glycated Hemoglobin Response in Finnish Patients with Type 2 Diabetes Mellitus Following Drug Initiation Using Evidence-Based Machine Learning Approaches**

Gunjan Chandra1, Piia Lavikainen2, Pekka Siirtola1, Satu Tamminen1, Anusha Ihalapathirana1, Tiina Laatikainen3,4,5, Janne Martikainen2, Juha Röning1

1Biomimetics and Intelligent Systems Group, Faculty of Information Technology and Electrical Engineering, University of Oulu, Oulu, Finland; 2School of Pharmacy, University of Eastern Finland, Kuopio, Finland; 3 North Karelia Wellbeing Services County (Siun Sote), Joensuu, Finland; 4Department of Public Health and Social Welfare, Finnish Institute for Health and Welfare, Helsinki, Finland; 5Institute of Public Health and Clinical Nutrition, University of Eastern Finland, Kuopio, Finland

**Table of contents:**

**Appendix 1.** Data pre-processing

**Supplementary figure S1.** Individual SHAP decision plots for four randomly selected samples (a–d) from the MLP model, showing feature values used to predict the change in HbA1c before antidiabetic drug initiation (base model). The legend indicates the actual change, while the x-axis represents the predicted change.

**Supplementary figure S2.** Individual SHAP decision plots for four randomly selected samples (a–d) from the MLP model, showing feature values used to predict the change in HbA1c before antidiabetic drug initiation (follow-up model). The legend indicates the actual change, while the x-axis represents the predicted change.

**Supplementary figure S3.** Comparison of baseline and change in (a) HbA1c and (b) BMI across drug classes in baseline model (N=1309). Note: The presented data reflects a smaller subset as not all patients had their BMI measured around response time.

**Supplementary table S1.** Definitions of predictors.

**Supplementary table S2.** Efficacy of antidiabetic drugs utilized in this study as obtained from randomized controlled trials among patients with and without metformin as a background therapy.

**Appendix 1.**

***Data pre-processing***

The inclusion criteria for treatment episodes ensured that only patients who initiated antidiabetic medications between 2012 and 2018 were included. Patients were excluded if there was no HbA1c data before 2011 or if they had medication data extending beyond 2019, requiring at least 365 days of continuous use. Additionally, only "new users" were considered, meaning no prior purchases of the drug between 1995 and 2011. To ensure clarity, episodes with the initiation of more than one antidiabetic drug at the same time were excluded. These criteria resulted in a refined dataset comprising 10,139 instances, i.e. new antidiabetic drug use periods lasting at least 12 months, with HbA1c change observations across 242 variables. After removing instances with missing records and response value (i.e., no HbA1c measurement within 365 days after the drug initiation), and restricting data to HbA1c response measurement in 80 to 365 days from the baseline (i.e., antidiabetic drug initiation) resulted in dataset of 1,698 instances. The mean time between the drug initiation and the follow-up measurement closest to the 12-month date was 264.5 days with a median of 280 days. Exclusion reduced the variables to 202 while maintaining the instance count. No outliers were identified at this stage, preserving the dataset’s shape at (1698, 202). Further refinement involved eliminating columns with consistent single values, resulting in a dataset of (1698, 185). Columns with 40% or more missing values were then excluded, yielding a dataset of (1698, 169). The samples with missing values of RCT-derived expected change were removed, resulting in a final dataset comprising 1,693 instances and 169 variables. For the follow-up model, one extra feature named First HbA1c post-drug start, a marker indicating the initial drug response, was added to the dataset. Finally, samples without follow-up HbA1c values taken before the 12-month response were dropped resulting in the final dataset for follow-up model having 1,157 instances with 170 variables.


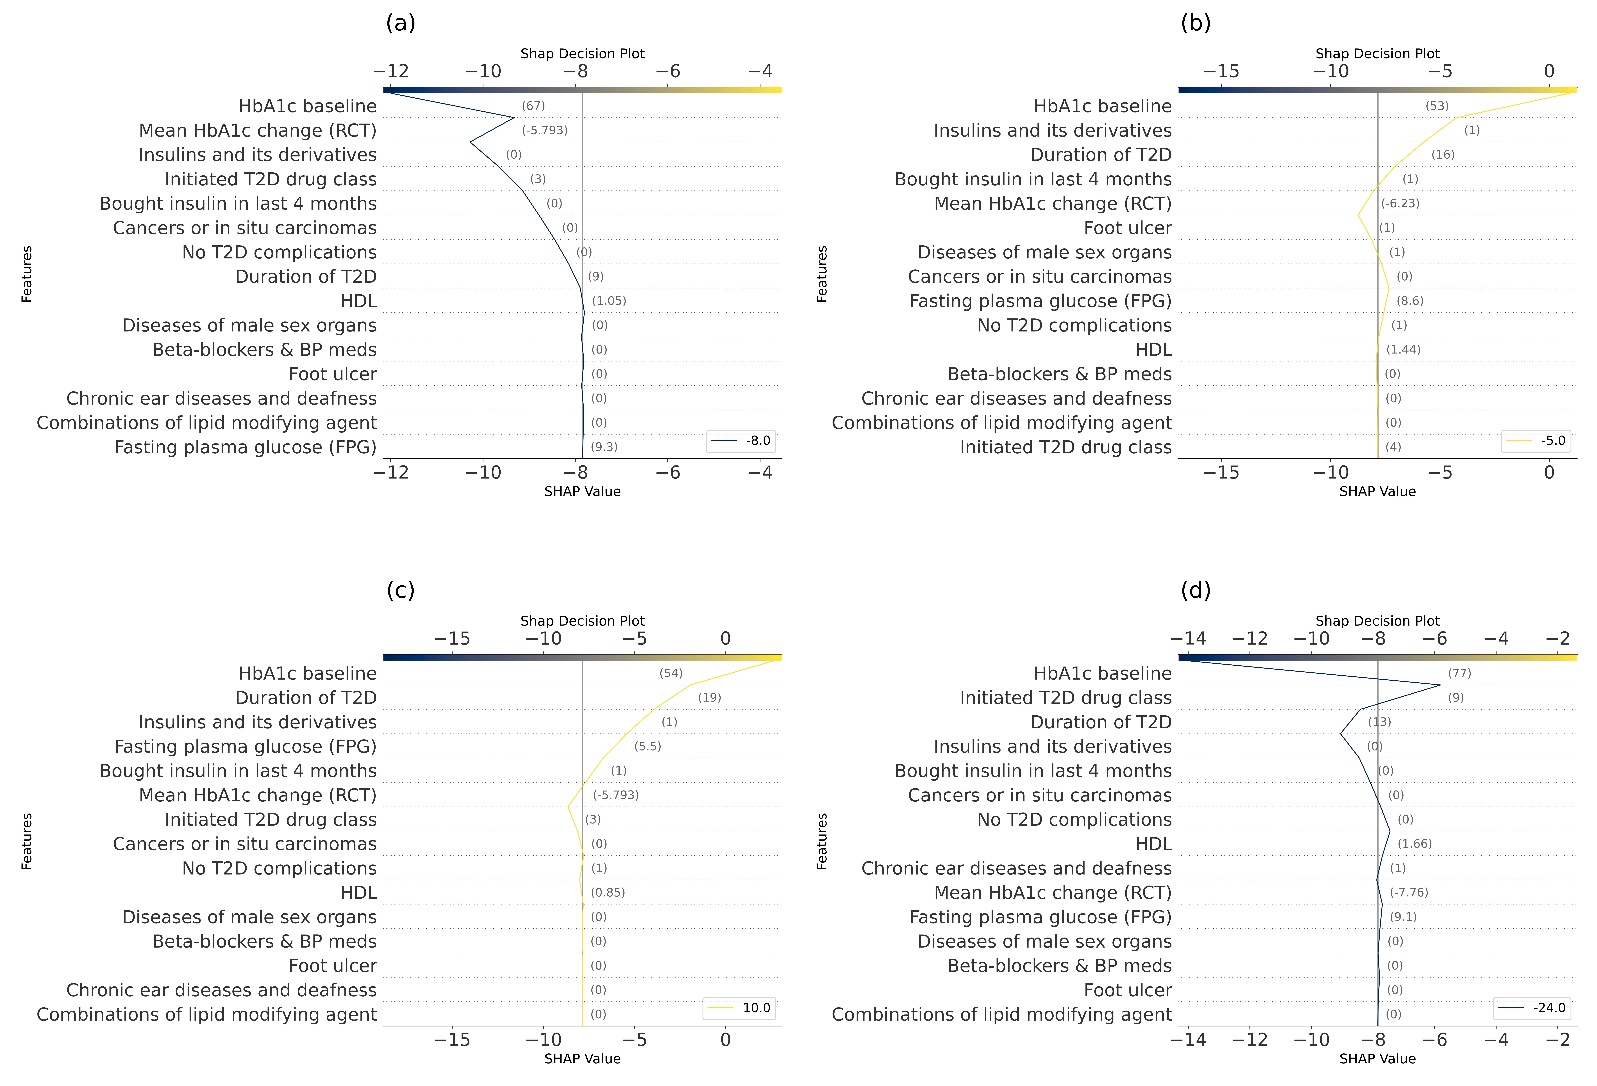


**Supplementary figure S1.** Individual SHAP decision plots for four randomly selected samples (a–d) from the MLP model, showing feature values used to predict the change in HbA1c before antidiabetic drug initiation (base model). The legend indicates the actual change, while the x-axis represents the predicted change.


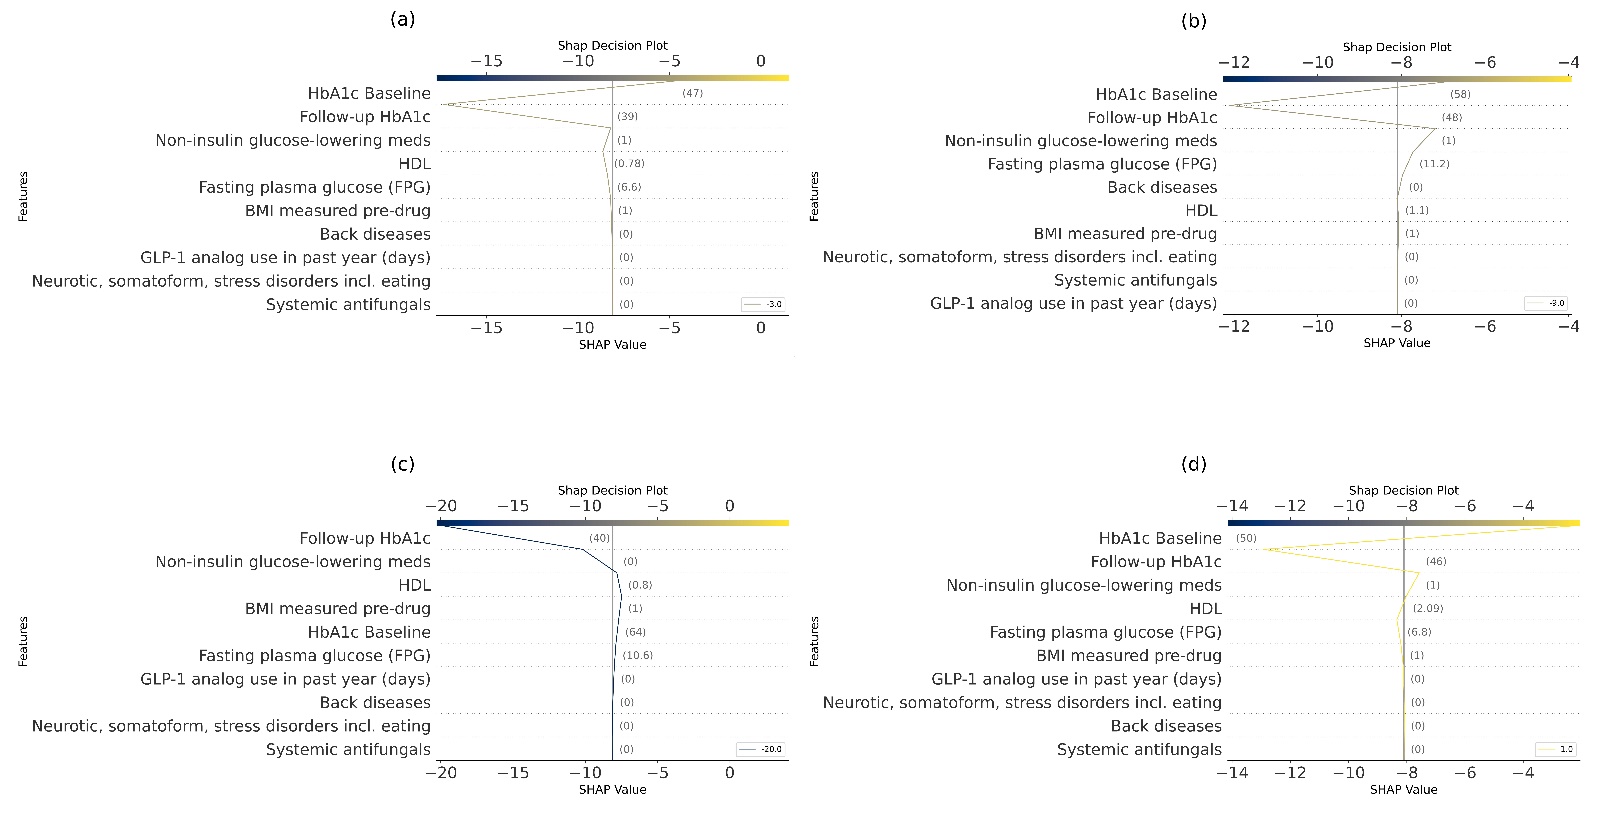


**Supplementary figure S2.** Individual SHAP decision plots for four randomly selected samples (a–d) from the MLP model, showing feature values used to predict the change in HbA1c before antidiabetic drug initiation (follow-up model). The legend indicates the actual change, while the x-axis represents the predicted change.


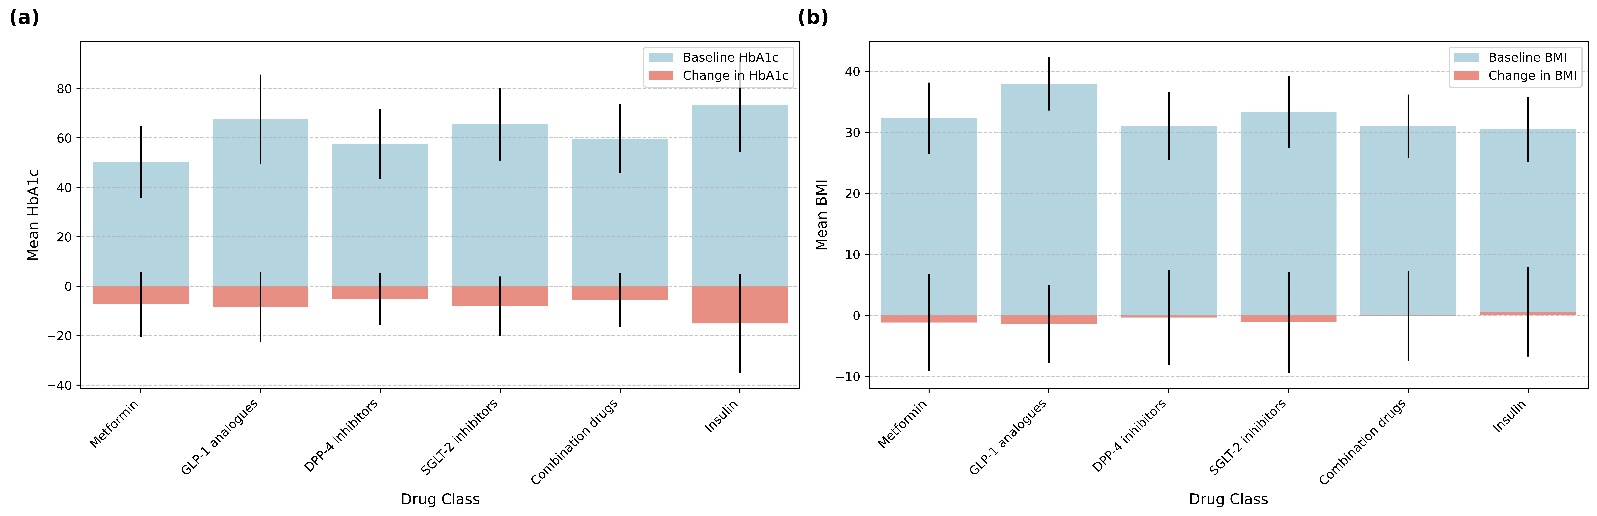


**Supplementary figure S3.** Comparison of baseline and change in (a) HbA1c and (b) BMI across drug classes in baseline model (N=1309). Note: The presented data reflects a smaller subset as not all patients had their BMI measured around response time.

**Supplementary table S1.** Definitions of potential predictors.

| Definition | ICD-10 code | ATC code | Other specification | Data source | Time of measurement |
| --- | --- | --- | --- | --- | --- |
| CLINICAL FACTORS | | | | | |
| Gender |  |  |  | EHR | At the time of drug initiation |
| Male |  |  |  |  |  |
| Female |  |  |  |  |  |
| Age, years |  |  |  | EHR | At the time of drug initiation |
| Age, classified, years |  |  | 1= ≤50,  2=51–60,  3=61–70,  4=71–80,  5=≥81 | EHR | At the time of drug initiation |
| Time since T2D diagnosis, years | E11 | A10 | Entitlement to a special refund for antidiabetic medications | EHR | At the time of drug initiation |
| TREATMENT-RELATED FACTORS | | | | | |
| Initiated antidiabetic medication |  | metformin (ATC code A10BA02)  GLP-1 analogues (A10BJ)  DPP-4 inhibitors (A10BH)  SGLT2 inhibitors (A10BK)  combinations of oral blood glucose lowering drugs (A10BG)  insulin (A10A) |  | FPR | At the time of drug initiation |
| Use of metformin (yes/no) |  | A10BA02 |  | FPR | At least one purchase within the year before the drug initiation |
| Use of glitazones (yes/no) |  | A10BG |  | FPR | At least one purchase within the year before the drug initiation |
| Use of sulfonylureas (yes/no) |  | A10BB |  | FPR | At least one purchase within the year before the drug initiation |
| Use of glinides (yes/no) |  | A10BX02 |  | FPR | At least one purchase within the year before the drug initiation |
| Use of combinations of oral blood glucose lowering drugs (yes/no) |  | A10BG |  | FPR | At least one purchase within the year before the drug initiation |

Table continues

**Supplementary table S1.** Continued

| Definition | ICD-10 code | ATC code | Other specification | Data source | Time of measurement |
| --- | --- | --- | --- | --- | --- |
| Use of DPP-4 inhibitors (yes/no) |  | A10BH |  | FPR | At least one purchase within the year before the drug initiation |
| Use of SGLT2 inhibitors (yes/no) |  | A10BK |  | FPR | At least one purchase within the year before the drug initiation |
| Use of GLP-1 analogues (yes/no) |  | A10BJ |  | FPR | At least one purchase within the year before the drug initiation |
| Use of insulin (yes/no) |  | A10A |  | FPR | At least one purchase within the year before the drug initiation |
|  |  |  |  |  |  |
| Use of metformin only (yes/no) |  | A10BA02 only |  | FPR | Within the year before the drug initiation |
| Use of metformin and other oral antidiabetic medications (yes/no) |  | A10BA02 + other A10B |  | FPR | Within the year before the drug initiation |
| Use of only other diabetes medications than insulin or metformin (yes/no) |  | A10B excluding A10BA02 and A10A |  | FPR | Within the year before the drug initiation |
| Use of insulin and oral antidiabetic medication (including metformin) (yes/no) |  | A10A + A10B |  | FPR | Within the year before the drug initiation |
| Use of insulin only (yes/no) |  | A10A only |  | FPR | Within the year before the drug initiation |
| Number of antidiabetic medications |  | Sum of different ATC codes within A10 |  |  | Within the year before the drug initiation |
|  |  |  |  |  |  |
| Use of other than antidiabetic drugs (Total of 130 different drug classes) (yes/no) |  | Third level of ATC code |  | FPR | Within the year before the drug initiation |
| Total number of medications in use |  | Sum of different ATC codes |  | FPR | Within the year before the drug initiation |
| FACTORS DESCRIBING PERSISTENCE TO ANTIDIABETIC MEDICATION WITHIN THE PREVIOUS YEAR | | | | | |
| Number of days of continuous use of metformin during the previous 12 months |  | A10BA02 |  | FPR | Within the year before the drug initiation |
| Number of days of continuous use of GLP-1 analogues during the previous 12 months |  | A10BJ |  | FPR | Within the year before the drug initiation |
| Number of days of continuous use of DPP-4 inhibitors during the previous 12 months |  | A10BH |  | FPR | Within the year before the drug initiation |

Table continues

**Supplementary table S1.** Continued

| Definition | ICD-10 code | ATC code | Other specification | Data source | Time of measurement |
| --- | --- | --- | --- | --- | --- |
| Number of days of continuous use of SGLT2 inhibitors during the previous 12 months |  | A10BK |  | FPR | Within the year before the drug initiation |
| Number of days of continuous use of combinations of oral blood glucose lowering drugs during the previous 12 months |  | A10BG |  | FPR | Within the year before the drug initiation |
| Number of days of continuous use of glitazones during the previous 12 months |  | A10BG |  | FPR | Within the year before the drug initiation |
| Number of days of continuous use of sulfonylureas during the previous 12 months |  | A10BB |  | FPR | Within the year before the drug initiation |
| Number of days of continuous use of glinides during the previous 12 months |  | A10BX02 |  | FPR | Within the year before the drug initiation |
| Number of days of continuous use of insulin during the previous 12 months |  | A10A |  | FPR | Within the year before the drug initiation |
| LABORATORY VALUES | | | | | |
| HbA1c at baseline, mmol/mol |  |  | B -HbA1c | EHR | 4 months before drug initiation until the date of drug initiation |
| HbA1c 12 months before, mmol/mol |  |  | B -HbA1c | EHR | The latest measured HbA1c value during 12-months to 4-months prior to the drug initiation |
| HbA1c follow-up measurement, mmol/mol |  |  | B -HbA1c | EHR | First HbA1c measurement after drug initiation |
| Fasting plasma glucose, mmol/l |  |  | fP-Gluk | EHR | Latest value until the drug initiation |
| Body mass index (BMI), kg/m2 |  |  |  | EHR | Latest value until the drug initiation |
| Total cholesterol, mmol/l |  |  | fP-Kol | EHR | Latest value until the drug initiation |
| Low-density lipoprotein cholesterol (LDL), mmol/l |  |  | fP-Kol-LDL | EHR | Latest value until the drug initiation |
| High-density lipoprotein cholesterol (HDL), mmol/l |  |  | fP-Kol-HDL | EHR | Latest value until the drug initiation |
| Triglycerids, mmol/l |  |  | fP-Trigly | EHR | Latest value until the drug initiation |
| Creatinine, µmol/l |  |  | P-Krea | EHR | Latest value until the drug initiation |

Table continues

**Supplementary table S1.** Continued

| Definition | ICD-10 code | ATC code | Other specification | Data source | Time of measurement |
| --- | --- | --- | --- | --- | --- |
| Classified creatinine, µmol/l |  |  | Creatinine out of the sex-specific reference values (1=yes/0=no) | EHR | Latest value until the drug initiation |
| eGFR, mL/min/1.73m2 |  |  | Estimated glomerular filtration rate based on age and sex (CKD-EPI equation) | EHR | Latest value until the drug initiation |
| Categorized eGFR, mL/min/1.73m2 |  |  | 1= eGFR ≥ 90  2= 60 ≤ eGFR < 90  3= 30 ≤ eGFR < 60  4= eGFR <30 | EHR | Latest value until the drug initiation |
| COMORBIDITIES | | | | | |
| T2D with ketoacidosis (yes/no) | E11.1 |  |  | EHR | At the time of drug initiation |
| T2D with kidney complications (yes/no) | E11.2 |  |  | EHR | At the time of drug initiation |
| T2D with ophthalmic complications (yes/no) | E11.3 |  |  | EHR | At the time of drug initiation |
| T2D with neurological complications (yes/no) | E11.4 |  |  | EHR | At the time of drug initiation |
| T2D with circulatory complications (yes/no) | E11.5 |  |  | EHR | At the time of drug initiation |
| T2D with other specified complications (yes/no) | E11.6 |  |  | EHR | At the time of drug initiation |
| T2D with several complications (yes/no) | E11.7 |  |  | EHR | At the time of drug initiation |
| T2D with unspecified complications (yes/no) | E11.8 |  |  | EHR | At the time of drug initiation |
| T2D without complications (yes/no) | E11.9 |  |  | EHR | At the time of drug initiation |
| Hypertension (yes/no) | I10 |  |  | EHR | At the time of drug initiation |
| Coronary heart disease (yes/no) | I20–I25 |  |  | EHR | At the time of drug initiation |
| Atrial fibrillation (yes/no) | I48 |  |  | EHR | At the time of drug initiation |
| Heart failure (yes/no) | I50, I11.0, I13.0, I13.2 |  |  | EHR | At the time of drug initiation |
| Peripheral arterial diseases (yes/no) | I70.2, I73.9 |  |  | EHR | At the time of drug initiation |

Table continues

**Supplementary table S1.** Continued

| Definition | ICD-10 code | ATC code | Other specification | Data source | Time of measurement |
| --- | --- | --- | --- | --- | --- |
| Stroke (incl. Sah) (yes/no) | I60, I61, I63 (excluding I63.6), I64 |  |  | EHR | At the time of drug initiation |
| Chronic kidney disease (yes/no) | N18, N19 |  |  | EHR | At the time of drug initiation |
| Neuropathies (yes/no) | G59, G63, G73, G99 |  |  | EHR | At the time of drug initiation |
| Blindness (yes/no) | H54 |  |  | EHR | At the time of drug initiation |
| Cancers (yes/no) | C00–C43, C45–C97 |  |  | EHR | At the time of drug initiation |
| Asthma (yes/no) | J45, J46 |  |  | EHR | At the time of drug initiation |
| Gout (yes/no) | M10 |  |  | EHR | At the time of drug initiation |
| Glaucoma (yes/no) | H40–H42 |  |  | EHR | At the time of drug initiation |
| Depression (yes/no) | F32, F33 |  |  | EHR | At the time of drug initiation |
| Dementia (yes/no) | F00–F03, G30 |  |  | EHR | At the time of drug initiation |
| Mental diseases (yes/no) | F20–F48 |  |  | EHR | At the time of drug initiation |
| Chronic obstructive pulmonary disease (yes/no) | J43–J44 |  |  | EHR | At the time of drug initiation |
| Rheumatoid and other arthritis (yes/no) | M05–M13, M32, M33, M45 |  |  | EHR | At the time of drug initiation |
| Osteoporosis (yes/no) | M80–M85 |  |  | EHR | At the time of drug initiation |
| Neuromuscular diseases (yes/no) | G70–G72 |  |  | EHR | At the time of drug initiation |
| Liver diseases excluding cancers (yes/no) | K70–K77 |  |  | EHR | At the time of drug initiation |
| Obesity (yes/no) | E66 |  | BMI≥30 | EHR | At the time of drug initiation |
| Dysfunctions of lipid metabolism (yes/no) | E78 |  |  | EHR | At the time of drug initiation |
| Cancers and in situ carcinomas (yes/no) | C00–C97, D00-D07, D09 |  |  | EHR | At the time of drug initiation |
| Diseases of blood and blood forming organs (yes/no) | D50-D53, D55-D77, D80-D84, D86, D89 |  |  | EHR | At the time of drug initiation |
| Diseases of endocrine glands (yes/no) | E00-E07, E15-E16, E20-E32, E34-E35 |  |  | EHR | At the time of drug initiation |
| Obesity and other metabolic diseases (yes/no) | E65-E68, E70-E80, E83-E85, E87-E90 |  |  | EHR | At the time of drug initiation |
| Dementia and organic psychical disorders (yes/no) | F00-F07, F09, G30-G32 |  |  | EHR | At the time of drug initiation |
| Psychical and behavioral disorders caused by drugs or psychoactive substances (yes/no) | F10-F16, F18-F19 |  |  | EHR | At the time of drug initiation |

Table continues

**Supplementary table S1.** Continued

| Definition | ICD-10 code | ATC code | Other specification | Data source | Time of measurement |
| --- | --- | --- | --- | --- | --- |
| Schizophrenia and delusional disorders (yes/no) | F20-F25, F28-F29 |  |  | EHR | At the time of drug initiation |
| Mood disorders (yes/no) | F30-F34, F38-F39 |  |  | EHR | At the time of drug initiation |
| Neurotic, somatoformic and stress related disorders (incl. eating disorders) (yes/no) | F40-F45, F48, F50, F52-F55, F59-F66, F68-F69 |  |  | EHR | At the time of drug initiation |
| Sleep disorders (yes/no) | F51, G47 |  |  | EHR | At the time of drug initiation |
| Other neurological disorders (yes/no) | G10-G13, G20-G26, G36-G37 |  |  | EHR | At the time of drug initiation |
| Epilepsy and migraine (yes/no) | G40-G44 |  |  | EHR | At the time of drug initiation |
| Diseases of nerves and nerve-muscle junction (yes/no) | G50-G64, G70-G73 |  |  | EHR | At the time of drug initiation |
| Chronic eye diseases and blindness (yes/no) | H15-H22, H25-H28, H30-H36, H40, H42, H46-H48, H53-H54 |  |  | EHR | At the time of drug initiation |
| Chronic ear diseases and deafness (yes/no) | H80-H83, H90-H91, H93-H95 |  |  | EHR | At the time of drug initiation |
| Hypertensive diseases (yes/no) | I10-I13, I15, I95, I97-I99 |  |  | EHR | At the time of drug initiation |
| Ischemic heart diseases (yes/no) | I20-I25 |  |  | EHR | At the time of drug initiation |
| Other diseases of heart and pulmonary circulation (yes/no) | I26-I28, I30-I52 |  |  | EHR | At the time of drug initiation |
| Cerebrovascular diseases (yes/no) | I60-I69 |  |  | EHR | At the time of drug initiation |
| Diseases or arteries and veins (yes/no) | I70-I74, I77-I89 |  |  | EHR | At the time of drug initiation |
| Chronic diseases of upper respiratory tract (yes/no) | J30-J39 |  |  | EHR | At the time of drug initiation |
| Chronic diseases of lower  respiratory tract (yes/no) | J40-J47, J60-J70, J80-J82, J84, J95-J96, J98-J99 |  |  | EHR | At the time of drug initiation |
| Parodontal diseases (yes/no) | K05 |  |  | EHR | At the time of drug initiation |
| Diseases of esophagus, stomach and duodenum (yes/no) | K21-K23, K25-K31 |  |  | EHR | At the time of drug initiation |

Table continues

**Supplementary table S1.** Continued

| Definition | ICD-10 code | ATC code | Other specification | Data source | Time of measurement |
| --- | --- | --- | --- | --- | --- |
| Inflammatory and other bowel diseases (yes/no) | K50-K52, K55-K63, K90 |  |  | EHR | At the time of drug initiation |
| Diseases of liver, pancreas, and biliary tract (yes/no) | K70-K77, K80-K83, K85-K87 |  |  | EHR | At the time of drug initiation |
| Chronic diseases of skin (yes/no) | L10-L14, L20-L21, L23-L28, L40-L45 |  |  | EHR | At the time of drug initiation |
| Inflammatory diseases of joints and connective tissue (yes/no) | M05-M14, M30-M36 |  |  | EHR | At the time of drug initiation |
| Arthrosis (yes/no) | M15-M19 |  |  | EHR | At the time of drug initiation |
| Other musculoskeletal diseases (yes/no) | M20-M25, M70-M73, M75-M77, M79-M85, M91-M94 |  |  | EHR | At the time of drug initiation |
| Back diseases (yes/no) | M40-M43, M45-M51, M53-M54 |  |  | EHR | At the time of drug initiation |
| Chronic diseases of kidneys and urinary tract (yes/no) | N00-N08, N17-N23 |  |  | EHR | At the time of drug initiation |
| Diseases of male sex organs (yes/no) | N40-N44, N48, N50-N51 |  |  | EHR | At the time of drug initiation |
| Diseases of female sex organs (yes/no) | N80-N81, N88 |  |  | EHR | At the time of drug initiation |
| Number of diseases | sum of the diseases above (cancers – diseases of female sex organs) |  |  | EHR | At the time of drug initiation |
| DIABETES-RELATED COMPLICATIONS | | | | | |
| Microvascular complications (yes/no) |  |  |  | EHR | At the time of drug initiation |
| Eye complications |  |  |  |  |  |
| *Retinopathy or other diabetic eye complication* | E11.3, H28.0, H36 (excluding H36.8), H40.5, H42.0, H43.1, H45.0 |  |  |  |  |
| *Blindness in one or two eyes* | H54 |  |  |  |  |
| Renal complications |  |  |  |  |  |
| *Renal insufficiency* | E11.2, N08.3, N18 |  |  |  |  |
| *End-stage renal disease (with or without dialysis)* | Z49, Z94.0 |  |  |  |  |

Table continues

**Supplementary table S1.** Continued

| Definition | ICD-10 code | ATC code | Other specification | Data source | Time of measurement |
| --- | --- | --- | --- | --- | --- |
| Neuropathic complications |  |  |  |  |  |
| *Diabetic neuropathy, Charcot foot or other diabetic foot complication* | E11.4, E11.5, E11.6, G59.0, G63.2, G73.0, G99.0, I70.2, I73.9, I79.2, L97, M14.2, M14.6, N48.4 |  |  |  |  |
| *Amputation of lower extremities* |  |  | NFQ10, NFQ20, NGQ10, NGQ20, NHQ10, NHQ20, NFQ48, NGQ48, NHQ30, NHQ40, NHQ60 |  |  |
| Macrovascular complications (yes/no) |  |  |  | EHR | At the time of drug initiation |
| Cardiovascular complications |  |  |  |  |  |
| *Angina pectoris* | I20 |  |  |  |  |
| *Chronic heart failure* | I11.0, I13.0, I13.2, I50 |  |  |  |  |
| *Incident myocardial infarction/cardiac arrest* | I21, I46 |  |  |  |  |
| *Other ischemic heart disease* | I22–I25 |  |  |  |  |
| Cerebrovascular complications |  |  |  |  |  |
| *Ischemic stroke* | I63–I66 (excluding I63.6) |  |  |  |  |
|  |  |  |  |  |  |
| EFFICACY OF ANTIDIABETIC DRUGS OBTAINED FROM RCT* | | | | | |
| Mean difference from RCTs* |  |  |  | RCT |  |
| Lower limit of 95% Confidence Interval for the Mean difference |  |  |  | RCT |  |
| Upper limit of 95% Confidence Interval for the Mean difference |  |  |  | RCT |  |

Abbreviations: eGFR, estimated glomerular filtration rate; EHR, electronic health records; FPR, Finnish Prescription Register; T2D, type 2 diabetes.

* See supplementary table S2 for more detailed specifications.

**Supplementary table S2.** Efficacy of antidiabetic drugs utilized in this study as obtained from randomized controlled trials among patients with and without metformin as a background therapy.

| ATC | Mean Difference (%) | | Lower 95% CI | Upper 95% CI | | Reference |
| --- | --- | --- | --- | --- | --- | --- |
| METFORMIN AS A BACKGROUND THERAPY | | | | | | |
| A10AB01 | -0.67 | -0.86 | | | -0.47 | 1 |
| A10AB04 | -0.67 | -0.86 | | | -0.47 | 1 |
| A10AB05 | -0.67 | -0.86 | | | -0.47 | 1 |
| A10AB06 | -0.67 | -0.86 | | | -0.47 | 1 |
| A10AC01 | -0.71 | -0.82 | | | -0.60 | 1 |
| A10AD05 | -0.67 | -0.86 | | | -0.47 | 1 |
| A10AE04 | -0.71 | -0.82 | | | -0.60 | 1 |
| A10AE05 | -0.71 | -0.82 | | | -0.60 | 1 |
| A10AE06 | -0.71 | -0.82 | | | -0.60 | 1 |
| A10BB07 | -0.57 | -0.66 | | | -0.48 | 1 |
| A10BB12 | -0.57 | -0.66 | | | -0.48 | 1 |
| A10BD05 | -0.83 | NA | | | NA | 2 |
| A10BD07 | -0.44 | -0.57 | | | -0.31 | 3 |
| A10BD08 | -0.44 | -0.57 | | | -0.31 | 3 |
| A10BD09 | -1.40 | -1.45 | | | -1.35 | 4 |
| A10BD11 | -0.44 | -0.57 | | | -0.31 | 3 |
| A10BD13 | -0.44 | -0.57 | | | -0.31 | 3 |
| A10BD15 | -0.47 | -0.58 | | | -0.37 | 3 |
| A10BD20 | -0.47 | -0.58 | | | -0.37 | 3 |
| A10BD21 | -1.47 | -1.62 | | | -1.31 | 5 |
| A10BG03 | -0.60 | -0.71 | | | -0.50 | 1 |
| A10BH01 | -0.53 | -0.58 | | | -0.47 | 1 |
| A10BH02 | -0.53 | -0.58 | | | -0.47 | 1 |
| A10BH03 | -0.53 | -0.58 | | | -0.47 | 1 |
| A10BH04 | -0.53 | -0.58 | | | -0.47 | 1 |
| A10BH05 | -0.53 | -0.58 | | | -0.47 | 1 |
| A10BJ01 | -0.60 | -0.73 | | | -0.47 | 1 |
| A10BJ02 | -0.80 | -0.89 | | | -0.70 | 1 |
| A10BJ03 | -0.43 | -0.57 | | | -0.29 | 1 |
| A10BJ05 | -0.89 | -1.05 | | | -0.73 | 1 |
| A10BJ06 | -1.33 | -1.50 | | | -1.16 | 1 |
| A10BK01 | -0.51 | -0.63 | | | -0.40 | 1 |
| A10BK03 | -0.57 | -0.71 | | | -0.42 | 1 |
| A10BK02 | -0.63 | -0.78 | | | -0.47 | 1 |
| A10BX02 | -0.64 | -0.85 | | | -0.43 | 1 |
| A10BX04 | -0.60 | -0.73 | | | -0.47 | 1 |
| A10BX07 | -0.80 | -0.89 | | | -0.70 | 1 |
| A10BX09 | -0.51 | -0.63 | | | -0.40 | 1 |
| A10BX12 | -0.57 | -0.71 | | | -0.42 | 1 |

Table continues

**Supplementary table S2.** Continued

| ATC | Mean Difference (%) | Lower 95% CI | Upper 95% CI | Reference |
| --- | --- | --- | --- | --- |
| WITHOUT METFORMIN AS A BACKGROUND THERAPY (DRUG-NAIVE PATIENTS) | | | | |
| A10AB01 | -1.12 | -1.74 | -0.50 | 1 |
| A10AB04 |  |  |  | 1 |
| A10AB05 | -1.12 | -1.74 | -0.50 | 1 |
| A10AB06 |  |  |  | 1 |
| A10AC01 | -1.12 | -1.74 | -0.50 | 1 |
| A10AD05 |  |  |  | 1 |
| A10AE04 | -1.12 | -1.74 | -0.50 | 1 |
| A10AE05 | -1.12 | -1.74 | -0.50 | 1 |
| A10AE06 | -1.12 | -1.74 | -0.50 | 1 |
| A10BA02 500 mg | -0.99 | -1.22 | -0.75 | 6 |
| A10BA02 1000 mg | -1.30 | -1.53 | -1.06 | 6 |
| A10BB12 | -0.86 | -1.05 | -0.66 | 1 |
| A10BD07 (metformin and sitagliptin, 500/50 mg) | -1.57 | -1.80 | -1.34 | 6 |
| A10BD07 (metformin and sitagliptin, 1000/50 mg) | -2.07 | -2.30 | -1.84 | 6 |
| A10BD08 |  |  |  | No results without metformin at baseline |
| A10BD11 |  |  |  | No results without metformin at baseline |
| A10BD15 |  |  |  | No results without metformin at baseline |
| A10BD09  (A12.5/P30) | -1.56 | -1.64 | -1.48 | 7 |
| A10BD09  (A25/P30) | -1.71 | -1.79 | -1.63 | 7 |
| A10BD20 | -2.03 | NA | NA | 8 |
| A10BD21 |  |  |  | No results without metformin at baseline |
| A10BG03 | -0.89 | -1.10 | -0.68 | 1 |
| A10BH01 100 mg | -0.60 | -0.75 | -0.46 | 1 |
| A10BH02 | -0.60 | -0.75 | -0.46 | 1 |
| A10BH03 | -0.60 | -0.75 | -0.46 | 1 |
| A10BH04 | -0.60 | -0.75 | -0.46 | 1 |
| A10BH05 | -0.60 | -0.75 | -0.46 | 1 |
| A10BJ01 | -0.98 | -1.42 | -0.55 | 1 |
| A10BJ02 | -1.45 | -2.18 | -0.72 | 1 |
| A10BJ05 | -1.29 | -1.96 | -0.62 | 1 |
| A10BJ06 | -1.48 | -2.15 | -0.81 | 1 |
| A10BK01 | -0.83 | -1.11 | -0.54 | 1 |
| A10BK02 | -1.02 | -1.68 | -0.36 | 1 |
| A10BK03 | -0.81 | -1.18 | -0.45 | 1 |
| A10BX02 | -0.77 | -1.07 | -0.47 | 1 |
| A10BX04 | -0.98 | -1.42 | -0.55 | 1 |
| A10BX07 | -1.45 | -2.18 | -0.72 | 1 |
| A10BX09 | -0.83 | -1.11 | -0.54 | 1 |
| A10BX12 | -0.81 | -1.18 | -0.45 | 1 |

[List of abbreviations](https://www.whocc.no/atc_ddd_alterations__cumulative/ddd_alterations/abbrevations/):

1. Tsapas A, Avgerinos I, Karagiannis T, Malandris K, Manolopoulos A, Andreadis P, Liakos A, Matthews DR, Bekiari E. Comparative effectiveness of glucose-lowering drugs for type 2 diabetes: A systematic review and network meta-analysis. Ann Intern Med. 2020;173:278–287. https://doi.org/10.7326/M20-0864

2. Einhorn D, Rendell M, Rosenzweig J, Egaq JW, Mathisen AL, Schneider RL. Pioglitazone Hydrochloride in Combination with Metformin in the Treatment of Qpe 2 Diabetes Mellitus: A Randomized, Placebo-Controlled Study for The Pioglitazone 027 Study Group*. Clin Ther. 2000;22:1395–1409.

3. Cai X, Gao X, Yang W, Han X, Ji L. Efficacy and Safety of Initial Combination Therapy in Treatment-Naïve Type 2 Diabetes Patients: A Systematic Review and Meta-analysis. Diabetes Ther. 2018;9:1995–2014. https://doi.org/10.1007/s13300-018-0493-2

4. De Fronzo RA, Burant CF, Fleck P, Wilson C, Mekki Q, Pratley RE. Efficacy and tolerability of the DPP-4 inhibitor alogliptin combined with pioglitazone, in metformin-treated patients with type 2 diabetes. J Clin Endocrinol Metab. 2012;97:1615–1622. https://doi.org/10.1210/jc.2011-2243

5. Rosenstock J, Hansen L, Zee P, Li Y, Cook W, Hirshberg B, Iqbal N. Dual add-on therapy in type 2 diabetes poorly controlled with metformin monotherapy: A Randomized double-blind trial of saxagliptin plus dapagliflozin addition versus single addition of saxagliptin or dapaglif lozin to metformin. Diabetes Care. 2015;38:376–383. https://doi.org/10.2337/dc14-1142

6. Goldstein B, Feinglos MN, Lunceford JK, Johnson J, Williams-Herman DE, for the Sitagliptin 036 Study Group. Effect of Initial Combination Therapy With Sitagliptin, a Dipeptidyl Peptidase-4 Control in Patients With Type 2 Diabetes. Diabetes Care. 2007;30:1979–1987. https://doi.org/10.2337/dc07-0627

7.Rosenstock J, Inzucchi SE, Seufert J, Fleck PR, Wilson CA, Mekki Q. Initial combination therapy with alogliptin and pioglitazone in drug-naïve patients with type 2 diabetes. Diabetes Care. 2010;33:2406–2408. https://doi.org/10.2337/dc10-0159

8. Hadjadj S, Rosenstock J, Meinicke T, Woerle HJ, Broedl UC. Initial Combination of Empagliflozin and Metformin in Patients With Type 2 Diabetes. Diabetes Care. 2016;39:1718–1728. https://doi.org/10.2337/dc16-0522
